# Supplementary material
Source: PubMed Central journal article supplement (PMC5124091)
Supplement: rspb20161556supp1.pdf [file rspb20161556supp1.pdf]

**Figure S1.** Time-calibrated phylogeny of carangoid fishes modified from Santini & Carnevale [27]. Scale at bottom of page in million years.

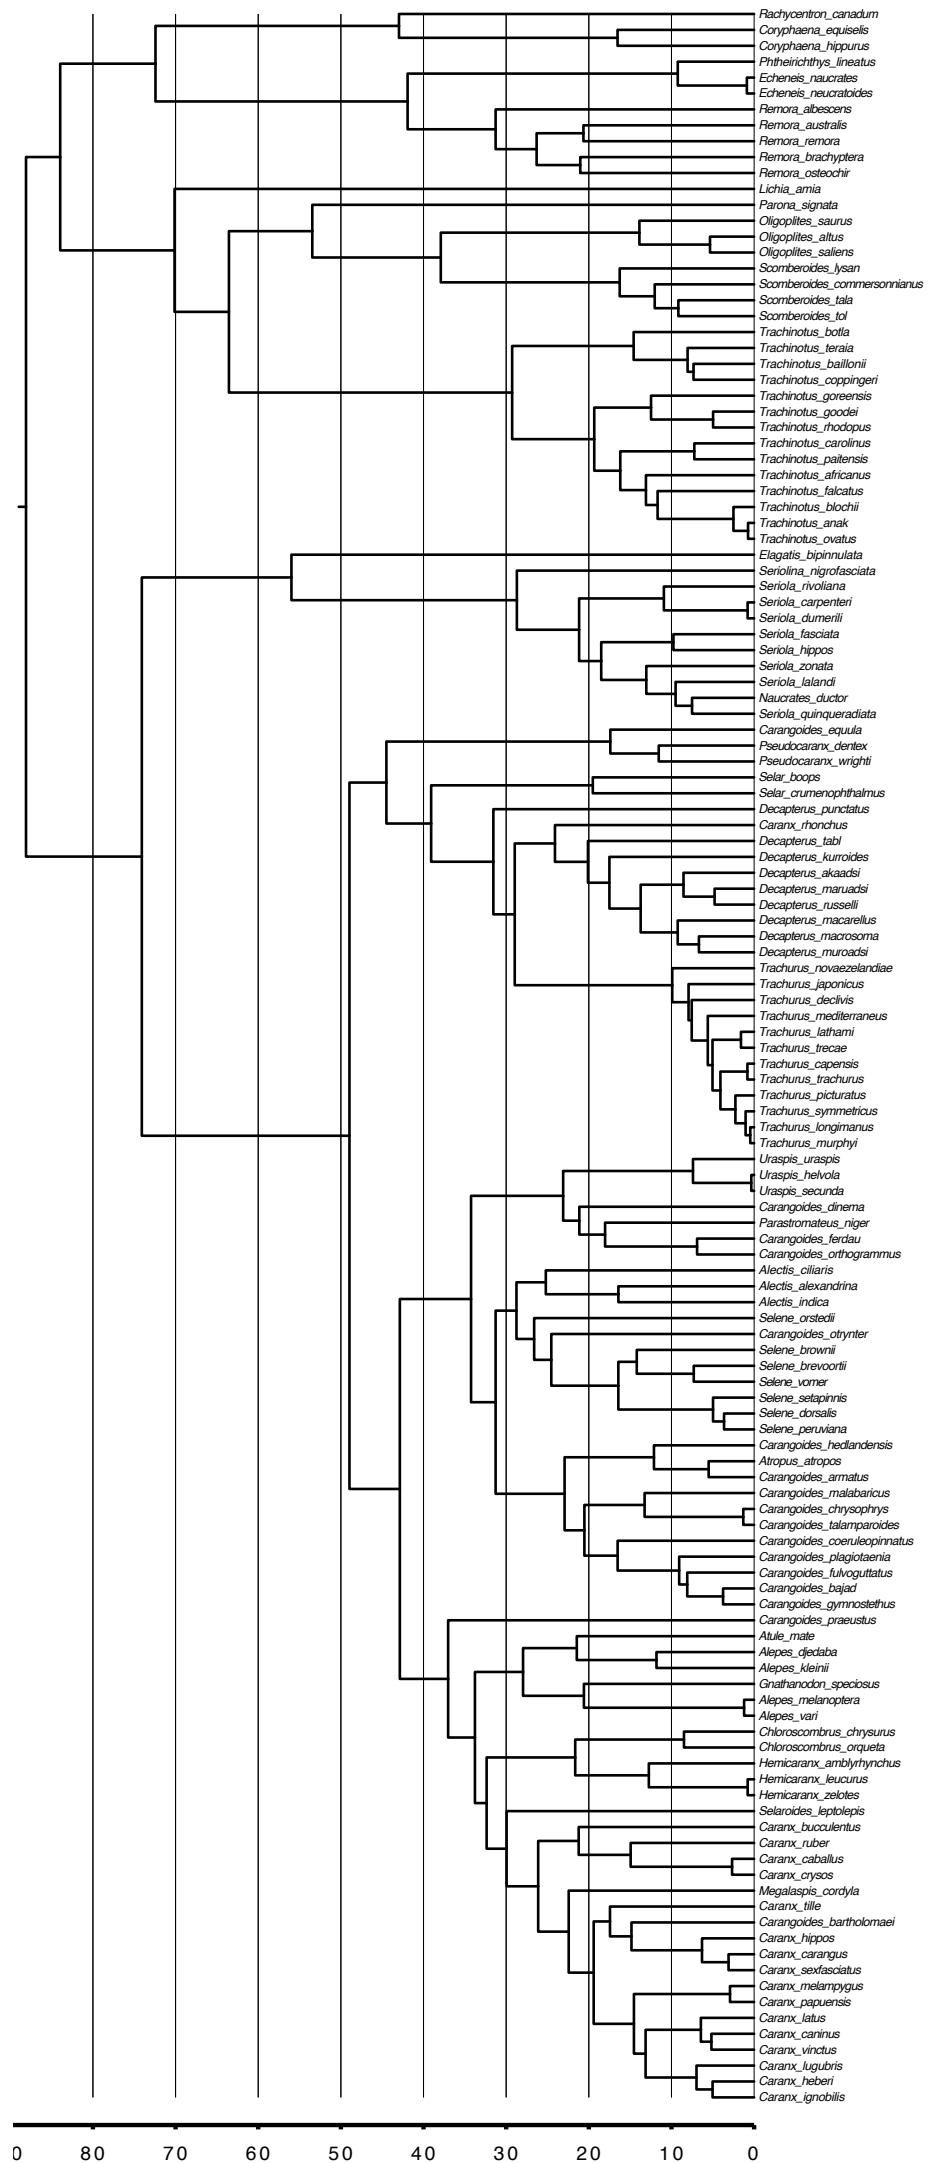

**Figure S2.** Morphospace of carangoids built on the first two PC axes (with percentage of the relative explained morphological variation between brackets), including all extant and fossil species. Colors are used to illustrate species from the four periods studied: Eocene, Oligocene, Miocene and Extant. Deformation grids illustrate shape variation along the first two PC axes from negative to positive scores (with percentage of the relative explained morphological variation between brackets).

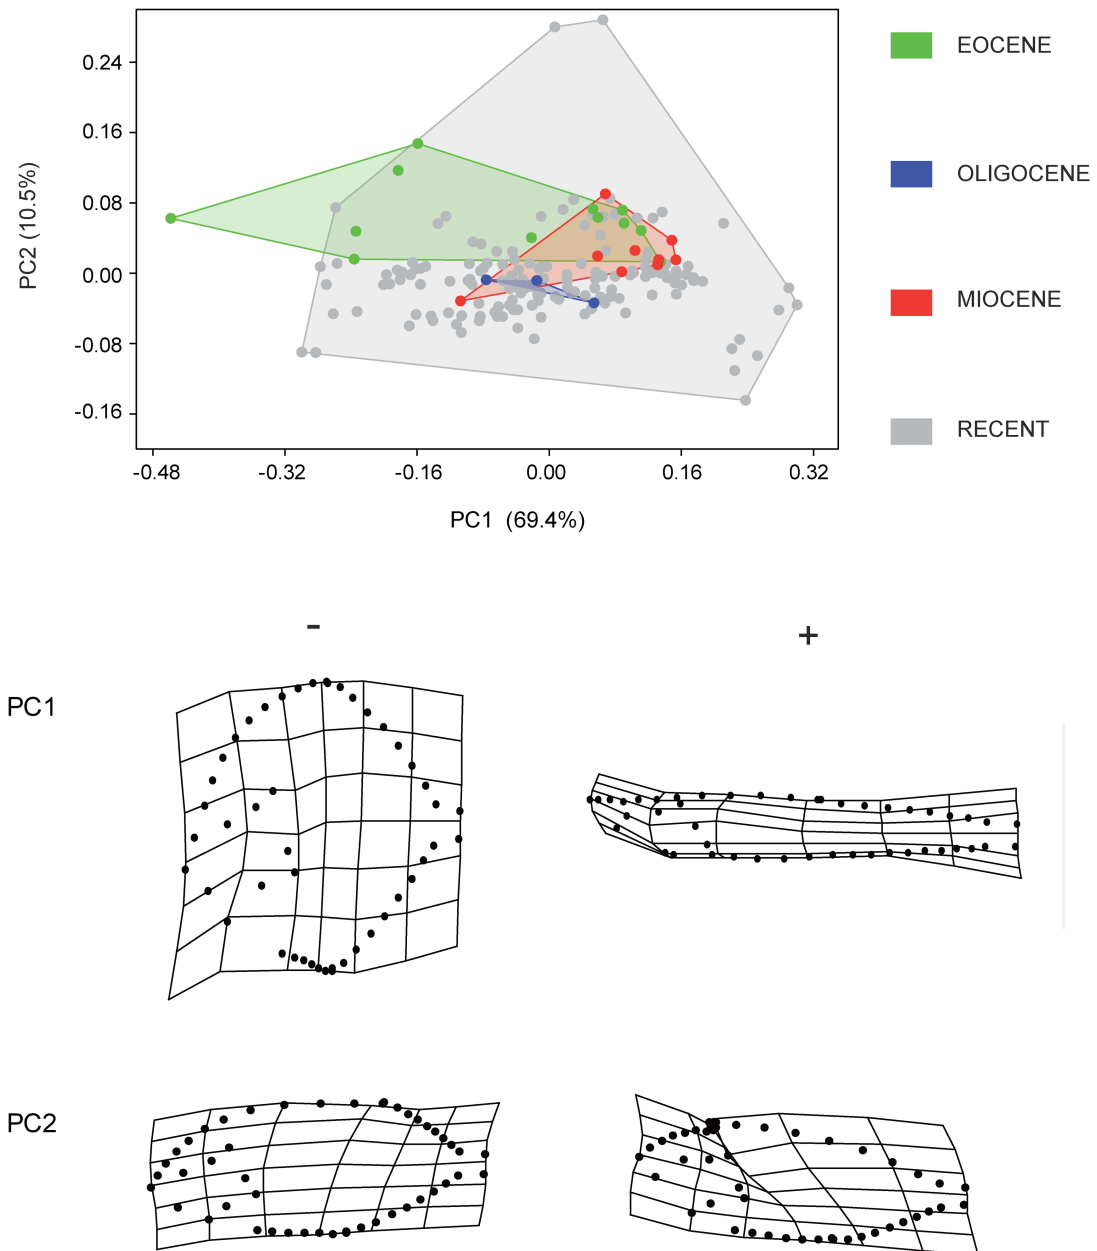

**Table S1.** Dataset list of studied species, with relative coding based on their habitat and diet. The specimen accession number and source are available from the authors upon request. Accession numbers of museum specimens (NHM London, California Academy of Sciences and LA County NHM) are available from authors upon request. Photographs of specimens were also obtained from online databases:

- Academia Sinica (<http://fishdb.sinica.edu.tw/eng/specimenquer.php>)
- Smithsonian ichthyological collection (<http://collections.nmnh.si.edu/search/fishes/>)
- Museum National d'Histoire Naturelle, Paris (<https://science.mnhn.fr/institution/mnhn/collection/ic/item/search/form>)
- “John E. Randall's Fish Photos” (<http://pbs.bishopmuseum.org/images/JER/>).

| Status                           | Family     | Species                             | N. of specimens | Maximum TL (cm) | Habitat  | Piscivory | References |
|----------------------------------|------------|-------------------------------------|-----------------|-----------------|----------|-----------|------------|
| Extant                           | Carangidae | <i>Alectis alexandrina</i>          | 1               | 100             | non-reef | yes       | 1, 2       |
|                                  |            | <i>Alectis ciliaris</i>             | 3               | 150             | reef     | yes       | 1, 3       |
|                                  |            | <i>Alectis indica</i>               | 3               | 165             | reef     | yes       | 1, 3       |
|                                  |            | <i>Alepes apercna</i>               | 1               | 30              | non-reef | no        | 1, 4       |
|                                  |            | <i>Alepes djedaba</i>               | 3               | 40              | reef     | no        | 1, 5       |
|                                  |            | <i>Alepes kleinii</i>               | 3               | 19              | reef     | no        | 1, 6       |
|                                  |            | <i>Alepes melanoptera</i>           | 3               | 25              | non-reef | no        | 1, 7       |
|                                  |            | <i>Alepes vari</i>                  | 4               | 56              | non-reef | yes       | 1, 3       |
|                                  |            | <i>Atropus atropus</i>              | 3               | 27              | non-reef | yes       | 1, 8       |
|                                  |            | <i>Atule mate</i>                   | 3               | 30              | reef     | no        | 1, 3       |
|                                  |            | <i>Campogramma glycos</i>           | 1               | 60              | non-reef | yes       | 1, 9       |
|                                  |            | <i>Carangoides armatus</i>          | 3               | 58              | reef     | yes       | 1, 7       |
|                                  |            | <i>Carangoides bajad</i>            | 3               | 55              | reef     | yes       | 1, 7       |
|                                  |            | <i>Carangoides bartholomaei</i>     | 2               | 100             | reef     | yes       | 1, 10      |
|                                  |            | <i>Carangoides chrysophrys</i>      | 3               | 80              | reef     | yes       | 1, 3       |
|                                  |            | <i>Carangoides ciliaris</i>         | 1               | 61              | non-reef | yes       | 1, 11      |
|                                  |            | <i>Carangoides coeruleopinnatus</i> | 3               | 41              | reef     | yes       | 1, 3       |
|                                  |            | <i>Carangoides dinema</i>           | 3               | 85              | reef     | yes       | 1, 7       |
|                                  |            | <i>Carangoides equula</i>           | 3               | 56              | reef     | yes       | 1, 3       |
|                                  |            | <i>Carangoides ferdau</i>           | 3               | 70              | reef     | yes       | 1, 3       |
| <i>Carangoides fulvoguttatus</i> | 3          | 135                                 | reef            | yes             | 1, 3     |           |            |

|                                  |   |     |          |     |       |
|----------------------------------|---|-----|----------|-----|-------|
| <i>Carangoides gymnostethus</i>  | 2 | 90  | reef     | yes | 1, 3  |
| <i>Carangoides hedlandensis</i>  | 3 | 32  | reef     | yes | 1, 3  |
| <i>Carangoides humerosus</i>     | 1 | 25  | reef     | yes | 1, 12 |
| <i>Carangoides malabaricus</i>   | 3 | 60  | reef     | yes | 1, 13 |
| <i>Carangoides oblongus</i>      | 2 | 46  | reef     | yes | 1, 3  |
| <i>Carangoides orthogrammus</i>  | 2 | 75  | reef     | no  | 1, 3  |
| <i>Carangoides otrynter</i>      | 3 | 60  | non-reef | yes | 1, 14 |
| <i>Carangoides plagiotaenia</i>  | 2 | 50  | reef     | yes | 1, 3  |
| <i>Carangoides praeustus</i>     | 1 | 25  | non-reef | yes | 1, 7  |
| <i>Carangoides talamparoides</i> | 3 | 51  | reef     | yes | 1, 3  |
| <i>Caranx bucculentus</i>        | 1 | 66  | reef     | yes | 1, 13 |
| <i>Caranx caballus</i>           | 3 | 62  | non-reef | yes | 1, 15 |
| <i>Caranx caninus</i>            | 3 | 115 | non-reef | yes | 1, 15 |
| <i>Caranx crysos</i>             | 2 | 70  | reef     | yes | 1, 2  |
| <i>Caranx fischeri</i>           | 1 | 53  | non-reef | yes | 1, 16 |
| <i>Caranx heberi</i>             | 3 | 88  | reef     | yes | 1, 17 |
| <i>Caranx hippos</i>             | 3 | 124 | reef     | yes | 1, 2  |
| <i>Caranx ignobilis</i>          | 3 | 170 | reef     | yes | 1, 3  |
| <i>Caranx latus</i>              | 3 | 112 | reef     | yes | 1, 18 |
| <i>Caranx lugubris</i>           | 3 | 100 | non-reef | yes | 1, 3  |
| <i>Caranx melampygius</i>        | 3 | 130 | reef     | yes | 1, 3  |
| <i>Caranx papuensis</i>          | 3 | 88  | reef     | yes | 1, 3  |
| <i>Caranx rhonchus</i>           | 2 | 60  | non-reef | yes | 1, 2  |
| <i>Caranx ruber</i>              | 3 | 69  | reef     | yes | 1, 19 |
| <i>Caranx senegallus</i>         | 1 | 100 | non-reef | yes | 1, 20 |
| <i>Caranx sexfasciatus</i>       | 3 | 100 | non-reef | yes | 1, 3  |
| <i>Caranx tille</i>              | 2 | 80  | reef     | yes | 1, 3  |
| <i>Caranx vinctus</i>            | 3 | 37  | non-reef | yes | 1, 14 |
| <i>Chloroscombrus chrysurus</i>  | 3 | 65  | non-reef | yes | 1, 2  |
| <i>Chloroscombrus orqueta</i>    | 4 | 30  | non-reef | no  | 1, 15 |
| <i>Decapterus akaadsi</i>        | 1 | 35  | non-reef | no  | 1, 8  |
| <i>Decapterus koheru</i>         | 1 | 40  | non-reef | no  | 1, 21 |

|                                    |   |     |          |     |       |
|------------------------------------|---|-----|----------|-----|-------|
| <i>Decapterus kurroides</i>        | 2 | 45  | reef     | no  | 1, 3  |
| <i>Decapterus macarellus</i>       | 3 | 46  | non-reef | no  | 1, 22 |
| <i>Decapterus macrosoma</i>        | 3 | 35  | reef     | no  | 1, 3  |
| <i>Decapterus maruadsi</i>         | 2 | 28  | reef     | no  | 1, 23 |
| <i>Decapterus muroadsi</i>         | 2 | 55  | non-reef | no  | 1, 24 |
| <i>Decapterus punctatus</i>        | 3 | 35  | reef     | no  | 1, 2  |
| <i>Decapterus russelli</i>         | 3 | 45  | non-reef | no  | 1, 3  |
| <i>Decapterus tabl</i>             | 3 | 50  | reef     | no  | 1, 3  |
| <i>Elagatis bipinnulata</i>        | 3 | 180 | reef     | yes | 1, 9  |
| <i>Gnathanodon speciosus</i>       | 3 | 120 | reef     | yes | 1, 22 |
| <i>Hemicaranx amblyrhynchus</i>    | 4 | 50  | non-reef | no  | 1, 18 |
| <i>Hemicaranx bicolor</i>          | 1 | 70  | non-reef | no  | 1, 2  |
| <i>Hemicaranx leucurus</i>         | 3 | 30  | non-reef | no  | 1, 22 |
| <i>Hemicaranx zelotes</i>          | 2 | 35  | non-reef | no  | 1, 22 |
| <i>Lichia amia</i>                 | 3 | 200 | non-reef | yes | 1, 9  |
| <i>Megalaspis cordyla</i>          | 3 | 80  | reef     | yes | 1, 3  |
| <i>Naucrates ductor</i>            | 3 | 70  | reef     | yes | 1, 2  |
| <i>Oligoplites altus</i>           | 3 | 62  | non-reef | no  | 1, 22 |
| <i>Oligoplites palometa</i>        | 1 | 50  | non-reef | yes | 1, 10 |
| <i>Oligoplites refulgens</i>       | 3 | 25  | non-reef | yes | 1, 22 |
| <i>Oligoplites saliens</i>         | 3 | 50  | non-reef | no  | 1, 10 |
| <i>Oligoplites saurus</i>          | 3 | 35  | reef     | yes | 1, 22 |
| <i>Pantolabus radiatus</i>         | 1 | 40  | reef     | no  | 1, 12 |
| <i>Parastromateus niger</i>        | 3 | 75  | reef     | no  | 1, 3  |
| <i>Parona signata</i>              | 3 | 60  | non-reef | no  | 1, 25 |
| <i>Pseudocaranx cheilio</i>        | 1 | 122 | reef     | no  | 1, 26 |
| <i>Pseudocaranx dentex</i>         | 3 | 122 | reef     | no  | 1, 3  |
| <i>Pseudocaranx wrighti</i>        | 1 | 78  | non-reef | no  | 1, 3  |
| <i>Scomberoides commersonianus</i> | 3 | 120 | reef     | yes | 1, 3  |
| <i>Scomberoides lysan</i>          | 3 | 110 | reef     | yes | 1, 3  |
| <i>Scomberoides tala</i>           | 2 | 70  | reef     | yes | 1, 3  |
| <i>Scomberoides tol</i>            | 3 | 60  | reef     | yes | 1, 3  |

|                                |   |     |          |     |       |
|--------------------------------|---|-----|----------|-----|-------|
| <i>Selar boops</i>             | 3 | 28  | reef     | no  | 1, 3  |
| <i>Selar crumenophthalmus</i>  | 3 | 70  | reef     | no  | 1, 22 |
| <i>Selaroides leptolepis</i>   | 3 | 22  | reef     | no  | 1, 3  |
| <i>Selene brevoortii</i>       | 3 | 43  | non-reef | yes | 1, 22 |
| <i>Selene brownii</i>          | 1 | 29  | non-reef | yes | 1, 27 |
| <i>Selene dorsalis</i>         | 2 | 38  | non-reef | yes | 1, 9  |
| <i>Selene orstedii</i>         | 3 | 33  | non-reef | yes | 1, 22 |
| <i>Selene peruviana</i>        | 4 | 40  | non-reef | yes | 1, 15 |
| <i>Selene setapinnis</i>       | 3 | 60  | non-reef | yes | 1, 10 |
| <i>Selene vomer</i>            | 3 | 48  | non-reef | yes | 1, 18 |
| <i>Seriola carpenteri</i>      | 2 | 73  | non-reef | yes | 1, 9  |
| <i>Seriola dumerili</i>        | 3 | 190 | reef     | yes | 1, 3  |
| <i>Seriola fasciata</i>        | 3 | 68  | non-reef | yes | 1, 2  |
| <i>Seriola hippos</i>          | 2 | 150 | non-reef | yes | 1, 3  |
| <i>Seriola lalandi</i>         | 3 | 250 | non-reef | yes | 1, 3  |
| <i>Seriola peruana</i>         | 1 | 40  | non-reef | yes | 1, 22 |
| <i>Seriola quinqueradiata</i>  | 3 | 150 | non-reef | yes | 1, 25 |
| <i>Seriola rivoliana</i>       | 3 | 180 | non-reef | yes | 1, 23 |
| <i>Seriola zonata</i>          | 1 | 75  | non-reef | yes | 1, 18 |
| <i>Seriolina nigrofasciata</i> | 3 | 70  | reef     | yes | 1, 3  |
| <i>Trachinotus africanus</i>   | 2 | 92  | reef     | no  | 1, 7  |
| <i>Trachinotus anak</i>        | 1 | 100 | non-reef | no  | 1, 3  |
| <i>Trachinotus baillonii</i>   | 3 | 60  | reef     | yes | 1, 3  |
| <i>Trachinotus blochii</i>     | 3 | 110 | reef     | no  | 1, 3  |
| <i>Trachinotus botla</i>       | 3 | 75  | reef     | no  | 1, 3  |
| <i>Trachinotus carolinus</i>   | 1 | 64  | non-reef | yes | 1, 18 |
| <i>Trachinotus coppingeri</i>  | 1 | 30  | non-reef | no  | 1, 3  |
| <i>Trachinotus falcatus</i>    | 3 | 138 | reef     | yes | 1, 18 |
| <i>Trachinotus goodei</i>      | 1 | 50  | reef     | yes | 1, 18 |
| <i>Trachinotus goreensis</i>   | 1 | 100 | non-reef | yes | 1, 20 |
| <i>Trachinotus kennedyi</i>    | 1 | 90  | non-reef | yes | 1, 22 |
| <i>Trachinotus marginatus</i>  | 2 | 45  | non-reef | yes | 1, 25 |

|               |                                 |   |     |          |     |       |
|---------------|---------------------------------|---|-----|----------|-----|-------|
|               | <i>Trachinotus maxillosus</i>   | 1 | 80  | non-reef | yes | 1, 2  |
|               | <i>Trachinotus mookalee</i>     | 3 | 90  | non-reef | yes | 1, 7  |
|               | <i>Trachinotus ovatus</i>       | 3 | 70  | non-reef | yes | 1, 9  |
|               | <i>Trachinotus paitensis</i>    | 3 | 51  | non-reef | yes | 1, 15 |
|               | <i>Trachinotus rhodopus</i>     | 3 | 61  | reef     | yes | 1, 15 |
|               | <i>Trachinotus stilbe</i>       | 1 | 34  | non-reef | yes | 1, 22 |
|               | <i>Trachinotus teraia</i>       | 1 | 68  | non-reef | yes | 1, 28 |
|               | <i>Trachurus capensis</i>       | 2 | 67  | non-reef | yes | 1, 2  |
|               | <i>Trachurus declivis</i>       | 2 | 72  | non-reef | yes | 1, 3  |
|               | <i>Trachurus delagoa</i>        | 3 | 35  | non-reef | no  | 1, 9  |
|               | <i>Trachurus indicus</i>        | 1 | 35  | reef     | no  | 1, 7  |
|               | <i>Trachurus japonicus</i>      | 3 | 50  | non-reef | no  | 1, 8  |
|               | <i>Trachurus lathami</i>        | 1 | 40  | reef     | no  | 1, 18 |
|               | <i>Trachurus longimanus</i>     | 1 | 25  | non-reef | no  | 1, 22 |
|               | <i>Trachurus mediterraneus</i>  | 3 | 67  | non-reef | yes | 1, 9  |
|               | <i>Trachurus murphyi</i>        | 2 | 70  | non-reef | no  | 1, 22 |
|               | <i>Trachurus novaezelandiae</i> | 1 | 55  | non-reef | no  | 1, 3  |
|               | <i>Trachurus picturatus</i>     | 2 | 60  | non-reef | no  | 1, 9  |
|               | <i>Trachurus symmetricus</i>    | 2 | 81  | non-reef | no  | 1, 15 |
|               | <i>Trachurus trachurus</i>      | 2 | 70  | non-reef | yes | 1, 9  |
|               | <i>Trachurus trecae</i>         | 1 | 39  | non-reef | no  | 1, 9  |
|               | <i>Ulua aurochs</i>             | 1 | 50  | non-reef | no  | 1, 12 |
|               | <i>Ulua mentalis</i>            | 1 | 100 | reef     | yes | 1, 3  |
|               | <i>Uraspis helvola</i>          | 2 | 58  | non-reef | no  | 1, 7  |
|               | <i>Uraspis secunda</i>          | 2 | 50  | non-reef | no  | 1, 2  |
|               | <i>Uraspis uraspis</i>          | 1 | 31  | reef     | no  | 1, 3  |
| Coryphaenidae | <i>Coryphaena equiselis</i>     | 1 | 127 | non-reef | yes | 1, 29 |
|               | <i>Coryphaena hippurus</i>      | 3 | 210 | non-reef | yes | 1, 29 |
| Echeneidae    | <i>Echeneis naucrates</i>       | 2 | 110 | reef     | no  | 1, 3  |
|               | <i>Echeneis neucratoides</i>    | 1 | 75  | reef     | no  | 1, 18 |
|               | <i>Phtheichthys lineatus</i>    | 2 | 76  | non-reef | no  | 1, 30 |
|               | <i>Remora albescens</i>         | 1 | 35  | non-reef | no  | 1, 31 |

|           |                |                                       |   |     |          |     |        |
|-----------|----------------|---------------------------------------|---|-----|----------|-----|--------|
|           |                | <i>Remora australis</i>               | 1 | 76  | non-reef | no  | 1, 3   |
|           |                | <i>Remora brachyptera</i>             | 1 | 50  | non-reef | no  | 1, 3   |
|           |                | <i>Remora osteochir</i>               | 2 | 44  | non-reef | no  | 1, 3   |
|           |                | <i>Remora remora</i>                  | 1 | 70  | reef     | no  | 1, 32  |
|           | Rachycentridae | <i>Rachycentron canadum</i>           | 3 | 200 | reef     | yes | 1, 33  |
| Eocene    | Carangidae     | <i>Archaeus oblongus</i>              | 1 | 16  | non-reef | ?   | 34     |
|           |                | <i>Ceratoichthys pinnatiformis</i>    | 3 | 23  | reef     | ?   | 35, 36 |
|           |                | <i>Eastmanalepes primaevus</i>        | 1 | 20  | reef     | ?   | 35, 37 |
|           |                | <i>Lichia veronensis</i>              | 1 | 29  | reef     | ?   | 35, 38 |
|           |                | <i>Paratrachinotus tenuiceps</i>      | 2 | 19  | reef     | ?   | 35, 36 |
|           |                | <i>Quasioligoplites mirus</i>         | 1 | 13  | non-reef | ?   | 39     |
|           |                | <i>Seriola fragosa</i>                | 1 | 20  | non-reef | ?   | 40     |
|           |                | <i>Seriola natgeosoc</i>              | 1 | 51  | non-reef | ?   | 40     |
|           |                | <i>Seriola prisca</i>                 | 3 | 80  | reef     | ?   | 35, 36 |
|           |                | <i>Trachicaranx pleuronectiformis</i> | 1 | 27  | reef     | ?   | 35, 36 |
|           |                | <i>Trachicaranx tersus</i>            | 1 | 23  | non-reef | ?   | 34     |
|           |                | <i>Vomeropsis triurus</i>             | 3 | 12  | reef     | ?   | 35, 36 |
| Oligocene | Carangidae     | <i>Caranx daniltschenkoi</i>          | 1 | 40  | non-reef | ?   | 38     |
|           |                | <i>Caranx glarisianus</i>             | 1 | 70  | non-reef | ?   | 41     |
|           |                | <i>Selar quassus</i>                  | 1 | 14  | non-reef | ?   | 38     |
| Miocene   | Carangidae     | <i>Alepes pin</i>                     | 1 | 5   | non-reef | ?   | 42     |
|           |                | <i>Caranx quietus</i>                 | 1 | 10  | non-reef | ?   | 38     |
|           |                | <i>Decapterus abbreviatus</i>         | 1 | 10  | non-reef | ?   | 43     |
|           |                | <i>Decapterus fusiformis</i>          | 1 | 7   | non-reef | ?   | 44     |
|           |                | <i>Decapterus praegracilis</i>        | 1 | 10  | non-reef | ?   | 44     |
|           |                | <i>Scomberoides spinosus</i>          | 1 | 12  | non-reef | ?   | 38     |
|           |                | <i>Selar fedotovi</i>                 | 1 | 13  | non-reef | ?   | 38     |
|           |                | <i>Selar weileri</i>                  | 1 | 12  | non-reef | ?   | 38     |
|           |                | <i>Seriola smithvanizi</i>            | 1 | 13  | non-reef | ?   | 44     |



## REFERENCES

1. Froese R., Pauly D. 2015 FishBase (version 05/2015). (World Wide Web electronic publication. [www.fishbase.org](http://www.fishbase.org)).
2. Smith-Vaniz W.F., Quéro J.-C., Desoutter M. 1990 Carangidae. p. 729-755. In Quero J.C. Hureau J.C., Karrer C., Post A., Saldanha L. (eds.) Check-list of the fishes of the eastern tropical Atlantic (CLOFETA). JNICT, Lisbon; SEI, Paris; and UNESCO, Paris. Vol. 2.
3. Paxton J.R., Hoese D.F., Allen G.R., Hanley J.E. 1989 Pisces. Petromyzontidae to Carangidae. Zoological Catalogue of Australia, Vol. 7. Australian Government Publishing Service, Canberra, 665 p.
4. Smith-Vaniz W.F. 1999 Carangidae. Jacks and scads (also trevallies, queenfishes, runners, amberjacks, pilotfishes, pampanos, etc.). p. 2659-2756. In Carpenter K.E., Niem V.H. (eds.) FAO species identification guide for fishery purposes. The living marine resources of the Western Central Pacific. Vol. 4. Bony fishes part 2 (Mugilidae to Carangidae). Rome, FAO. 2069-2790 p.
5. Bauchot M.-L. 1987 Poissons osseux. p. 891-1421. In Fischer W., Bauchot M.L., Schneider M. (eds.) Fiches FAO d'identification pour les besoins de la pêche. (rev. 1). Méditerranée et mer Noire. Zone de pêche 37. Vol. II. Commission des Communautés Européennes and FAO, Rome
6. Randall J.E. 1995 Coastal fishes of Oman. University of Hawaii Press, Honolulu, Hawaii. 439 p.
7. Smith-Vaniz W.F. 1984 Carangidae. In Fischer W., Bianchi G. (eds.) FAO species identification sheets for fishery purposes. Western Indian Ocean fishing area 51. Vol. 1. [pag. var.]. FAO, Rome.
8. Masuda H., Amaoka K., Araga C., Uyeno T., Yoshino T. 1984 The fishes of the Japanese Archipelago. Vol. 1. Tokai University Press, Tokyo, Japan. 437 p.
9. Smith-Vaniz W.F. 1986 Carangidae. p. 815-844. In Whitehead P.J.P., Bauchot M.-L., Hureau J.-C., Nielsen J., Tortonese E. (eds.) Fishes of the north-eastern Atlantic and the Mediterranean. UNESCO, Paris. vol. 2.
10. Cervigón F. 1993 Los peces marinos de Venezuela. Volume 2. Fundación Científica Los Roques, Caracas, Venezuela. 497 p.
11. Goren M., Dor M. 1994 An updated checklist of the fishes of the Red Sea (CLOFRES II). The Israel Academy of Sciences and Humanities, Jerusalem, Israel. 120 p.

12. Allen G.R., Swainston R. 1988 The marine fishes of north-western Australia: a field guide for anglers and divers. Western Australian Museum, Perth. 201 p.
13. Randall J.E., Allen G.R., Steene R.C. 1990 Fishes of the Great Barrier Reef and Coral Sea. University of Hawaii Press, Honolulu, Hawaii. 506 p.
14. Allen G.R., Robertson D.R. 1994 Fishes of the tropical eastern Pacific. University of Hawaii Press, Honolulu. 332 p.
15. Eschmeyer W.N., Herald E.S., Hammann H. 1983 A field guide to Pacific coast fishes of North America. Houghton Mifflin Company, Boston, U.S.A. 336 p.
16. Smith-Vaniz W.F., Carpenter K.E. 2007 Review of the crevalle jacks, *Caranx hippos* complex (Teleostei: Carangidae), with a description of a new species from West Africa. Fish. Bull. 105(2):207-233.
17. Fricke R. 1999 Fishes of the Mascarene Islands (Réunion, Mauritius, Rodriguez): an annotated checklist, with descriptions of new species. Koeltz Scientific Books, Koenigstein, Theses Zoologicae, 31:759 p
18. Robins C.R., Ray G.C. 1986 A field guide to Atlantic coast fishes of North America. Houghton Mifflin Company, Boston, U.S.A. 354 p.
19. Berry F.H., Smith-Vaniz W.F. 1978 Carangidae. In Fischer W. (ed.) FAO species identification sheets for fishery purposes. West Atlantic (Fishing Area 31). volume 1. FAO, Rome.
20. Smith-Vaniz W.F., Berry F.H. 1981 Carangidae. In W. Fischer, G. Bianchi and W.B. Scott (eds.) FAO species identification sheets for fishery purposes. Eastern Central Atlantic (fishing areas 34, 47 (in part)). Vol. 1.
21. Paulin C., Stewart A., Roberts C., McMillan P. 1989 New Zealand fish: a complete guide. National Museum of New Zealand Miscellaneous Series No. 19. 279 p.
22. Smith-Vaniz W.F. 1995 Carangidae. Jureles, pámpanos, cojinúas, zapateros, cocineros, casabes, macarelas, chicharros, jorobados, medregales, pez pilota. p. 940-986. In Fischer W., Krupp F., Schneider W. Sommer C, Carpenter K.E., Niem V. (eds.) Guia FAO para Identificación de Especies para lo Fines de la Pesca. Pacifico Centro-Oriental. 3 Vols. FAO, Rome.
23. Myers R.F. 1991 Micronesian reef fishes. Second Ed. Coral Graphics, Barrigada, Guam. 298 p.

24. Edwards A. 1990 Fish and fisheries of Saint Helena Island. Centre for Tropical Coastal Management Studies, University of Newcastle upon Tyne, England.
25. Robins C.R., Bailey R.M., Bond C.E., Brooker J.R., Lachner E.A., Lea R.N., Scott W.B. 1991 World fishes important to North Americans. Exclusive of species from the continental waters of the United States and Canada. Am. Fish. Soc. Spec. Publ. (21):243 p.
26. Dyer B.S., Westneat M.W. 2010 Taxonomy and biogeography of the coastal fishes of Juan Fernández Archipelago and Desventuradas Islands, Chile. Rev. Biol. Mar. Oceanogr. 45(S1):589-617.
27. Smith-Vaniz W.F. 2003. Carangidae. Jacks and scads (bumpers, pompanos, leatherjacks, amberjacks, pilotfishes, rudderfishes). p. 1426-1468. In Carpenter K.E. (ed.) FAO species identification guide for fishery purposes. The living marine resources of the Western Central Atlantic. Vol. 3: Bony fishes part 2 (Opistognathidae to Molidae), sea turtles and marine mammals.
28. Bauchot M.-L. 2003. Carangidae. p. 464-483 In Lévêque C., Paugy D., Teugels G.G. (eds.) Faune des poissons d'eaux douce et saumâtres de l'Afrique de l'Ouest, Tome 2. Coll. Faune et Flore tropicales 40. Musée Royal de l'Afrique Centrale, Tervuren, Belgique, Museum National d'Histoire Naturelle, Paris, France and Institut de Recherche pour le Développement, Paris, France. 815 p.
29. Palko B.J., Beardsley G.L., Richards W.J. 1982 Synopsis of the biological data on dolphin-fishes, *Coryphaena hippurus* Linnaeus and *Coryphaena equiselis* Linnaeus. FAO Fish. Synop. (130); NOAA Tech. Rep. NMFS Circ. (443).
30. Heemstra P.C. 1986 Echeneidae. p. 662-664. In Smith M.M., Heemstra P.C. (eds.) Smiths' sea fishes. Springer-Verlag, Berlin.
31. Gray K.N., McDowell J.R., Collette B.B., Graves J.E. 2009 A molecular phylogeny of the remoras and their relatives. Bull. Mar. Sci. 84(2):183-198.
32. Lachner E.A., Post A. 1990 Echeneidae. p. 725-728. In Quéro J.C., Hureau J.C., Karrer C., Post A., Saldanha L. (eds.) Check-list of the fishes of the eastern tropical Atlantic (CLOFETA). JNICT, Lisbon; SEI, Paris; and UNESCO, Paris. Vol. 2.
33. Shaffer R.V., Nakamura E.L. 1989 Synopsis of biological data on the cobia *Rachycentron canadum* (Pisces: Rachycentridae). NOAA Tech. Rep. NMFS 82, FAO Fisheries Synopsis 153.
34. Daniltshenko P.G. 1968 Fish of the Upper Palaeocene of Turkmenistan. Nauka, Moscow. pp. 113–156

35. Carnevale G., Bannikov A.F., Marramà G., Tyler J.C., Zorzini R. 2014 The Pesciara-Monte Postale Fossil-Lagerstätte: 2. Fishes and other vertebrates. In Papazzoni C.A., Giusberti L., Carnevale G., Roghi G., Bassi D., Zorzini R. (Eds.), The Bolca Fossil-Lagerstätte: A window into the Eocene World. Rend. Soc. Paleont. Ital. 4, 37–63.
36. Blot J. 1969 Les poissons fossiles du Monte Bolca classés jusqu'ici dans les familles des Carangidae, Menidae, Ephippidae, Scatophagidae. Studi e Ricerche sui Giacimenti Terziari di Bolca, 1: 1-525.
37. Bannikov A.F. 1984 An Eocene genus of scad, subfamily Caranginae. Paleontologicheskii Zhurnal 1984 (3): 133–135.
38. Bannikov A.F. 1990 Fossil carangids and apolectids of the USSR. Trudy Paleontologicheskogo Instituta 244: 1–108.
39. Bannikov A.F. 1995 A new Middle Eocene genus of carangid fishes (Perciformes) from the northern Caucasus. Paleontological Journal 29(2): 166-174.
40. Bannikov A.F. 2002 New carangid fishes of the genus *Seriola* (Carangidae, Seriolinae) from the Middle Eocene of the Northern Caucasus. Journal of Ichthyology 42: 1-6.
41. Pharissat A. 1991 La paléoichthyofaune du Rupélien de Froidefontaine (Territoire de Belfort). Annales Scientifiques de l'Université de Besançon, 3ème série, Géologie 4, 13–97.
42. Bannikov A.F. 1985 A Find of the Genus *Alepes*: Teleosts in the Miocene Crimean Oblast, Ukrainian-SSR USSR. Paleontologicheskii Zhurnal 1(1): 101–107.
43. Bannikov A.F. 1990 Fossil Carangid and Raven-Fish of the USSR. Tr. Paleontol. Inst., Akad. Nauk SSSR, Moscow: Nauka, 244.
44. Bannikov A.F. 1996 New Carangid Fish (Perciformes) from the Upper Maikop Deposits of Krasnodar Region. Paleontological Journal 30(1): 67-74.

**Table S2.** Principal component analysis on shape variables: eigenvalue and values of the variance explained by the first ten PC axes.

| Principal Component (PC) | Eigenvalue | % variance |
|--------------------------|------------|------------|
| 1                        | 0.018077   | 70.855     |
| 2                        | 0.002789   | 10.932     |
| 3                        | 0.002087   | 8.1817     |
| 4                        | 0.000670   | 2.6265     |
| 5                        | 0.000525   | 2.0566     |
| 6                        | 0.000336   | 1.3181     |
| 7                        | 0.000173   | 0.67675    |
| 8                        | 0.000155   | 0.60564    |
| 9                        | 0.000123   | 0.48363    |
| 10                       | 0.000009   | 0.37006    |

**Table S3.** Model specific parameters for best-fitting models to each morphological trait. In cases where there were multiple best-fitting models ( $\Delta AIC < 4$ ), parameters for all models are given.

|             |       |             | Brownian rate parameter ( $\sigma^2$ ) |                         |                         |                         |
|-------------|-------|-------------|----------------------------------------|-------------------------|-------------------------|-------------------------|
|             |       |             | Reef                                   | Non-Reef                | Piscivory               | Non-Piscivory           |
| Body length | logTL | BMS_habitat | 2.70E-03 $\pm$ 5.00E-04                | 7.80E-03 $\pm$ 6.00E-04 |                         |                         |
| Body shape  | PC1   | BMS_habitat | 1.80E-04 $\pm$ 4E-05                   | 5.80E-03 $\pm$ 3.94E-05 |                         |                         |
|             | PC2   | BMS_habitat | 3.88E-05 $\pm$ 8.30E-06                | 9.47E-05 $\pm$ 7.51E-06 |                         |                         |
|             |       | BMS_diet    |                                        |                         | 3.88E-05 $\pm$ 6.07E-06 | 1.00E-04 $\pm$ 6.44E-06 |
|             | PC3   | BMS_habitat | 2.69E-05 $\pm$ 6.93E-06                | 1.27E-04 $\pm$ 8.73E-06 |                         |                         |
